# Supplementary material for: Dynamic assembly of malate dehydrogenase-citrate synthase multienzyme complex in the mitochondria
Source: eLife journal article supplement (doi:10.7554/elife.107953), 2025-08-22

**Anti-Myc (MDH1)**

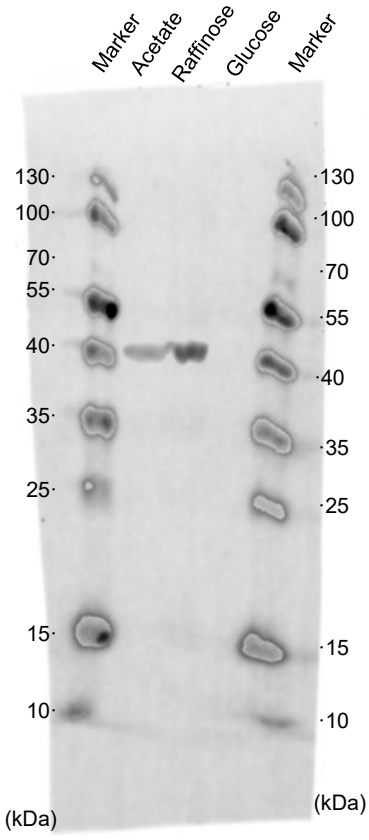

**Anti-Myc (MDH1)  
(Repeated  
experiment not  
included in Fig 1)**

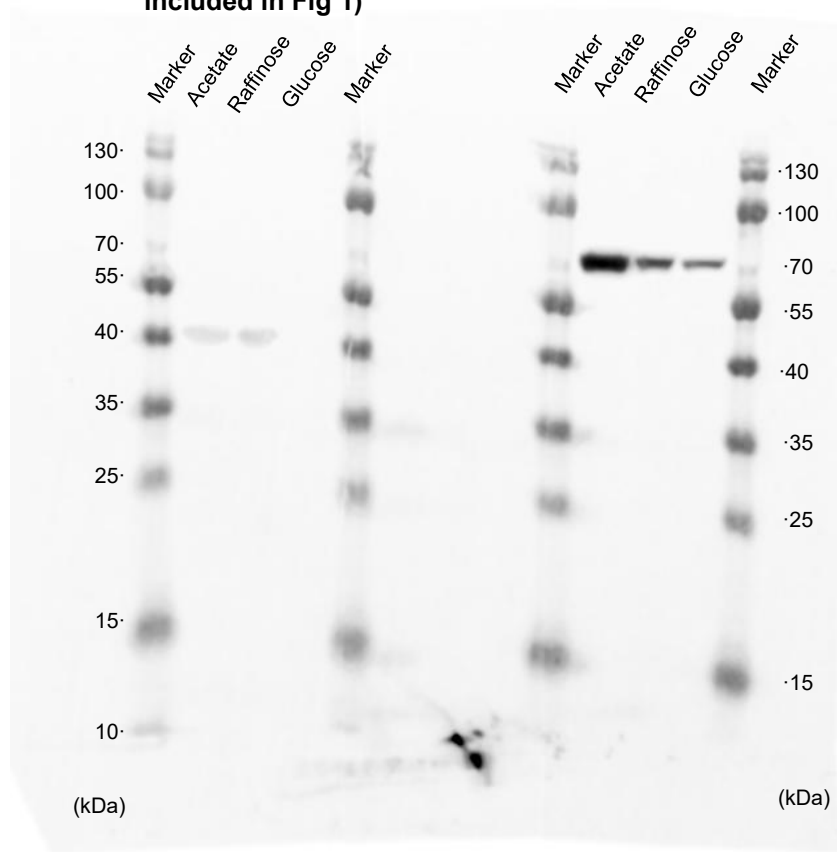

**Anti-HA (CIT1)**

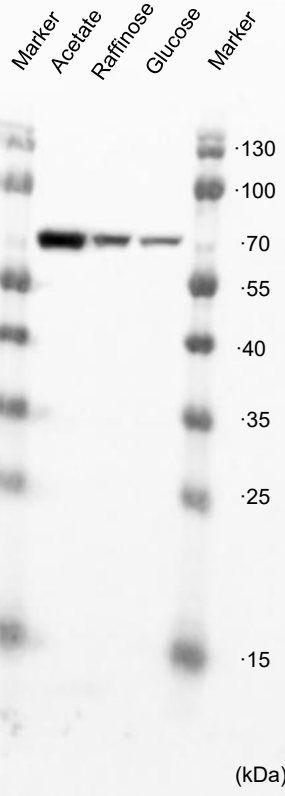

**Anti-AAC1  
(Not used)**

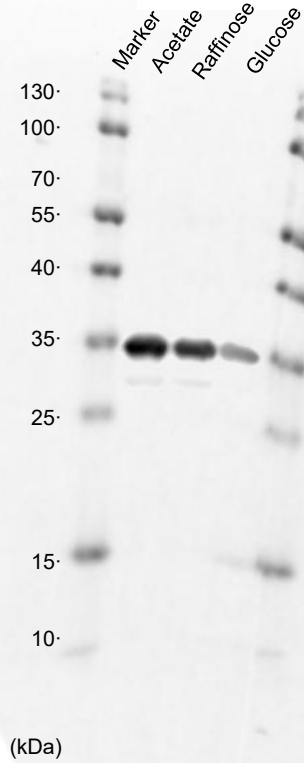

**Anti-DLD1**

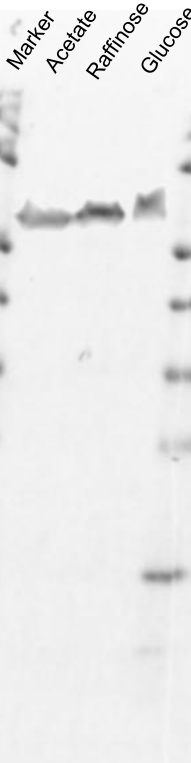

**Anti-KAR2  
(Not used)**

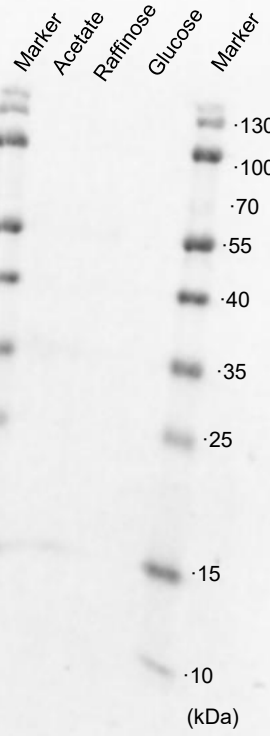

Supplement: fig1-data1 [file elife-107953-fig1-data1-v1.pdf]
