# Supplementary material for: Dynamic assembly of malate dehydrogenase-citrate synthase multienzyme complex in the mitochondria
Source: eLife journal article supplement (doi:10.7554/elife.107953), 2025-08-22

Figure 2 – figure supplement 1 A

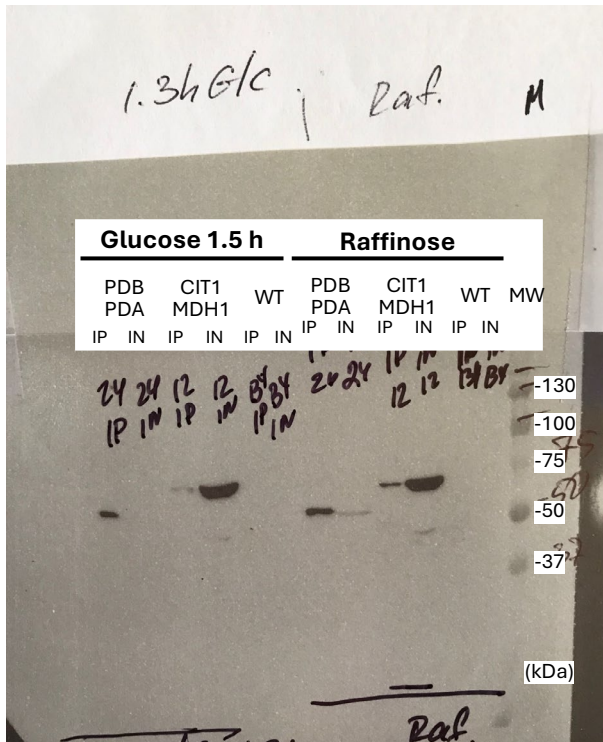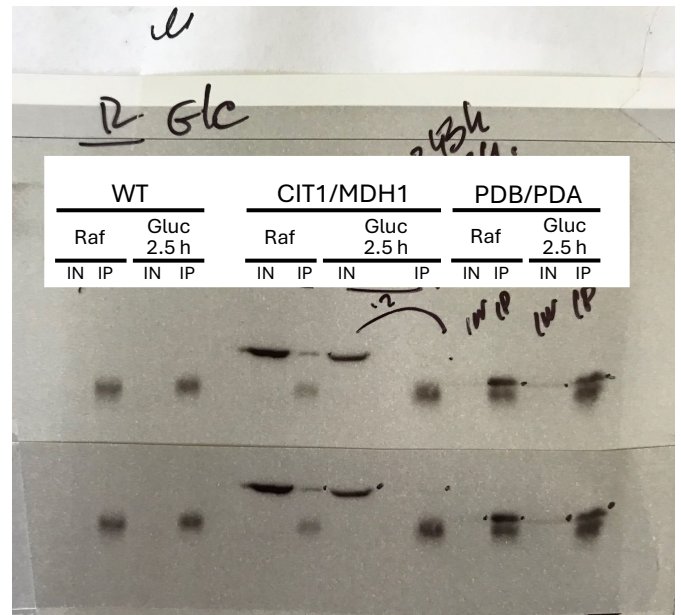

Figure 2 – figure supplement 1 C

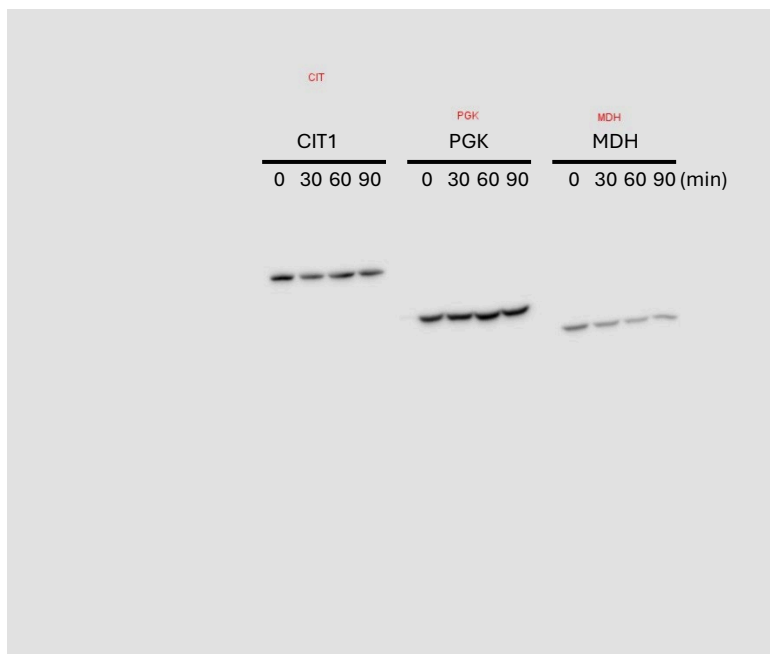

Supplement: fig2-figsupp1-data1 [file elife-107953-fig2-figsupp1-data1-v1.pdf]
